# Supplementary material
Source: ML conference proceedings conference paper supplement (https://openaccess.thecvf.com/content/cvpr_2017/html/Abdulnabi_Episodic_CAMN_Contextual_2017_CVPR_paper.html)
Supplement: Supplementary file 1 [file Abdulnabi_Episodic_CAMN_Contextual_2017_CVPR_supplemental.pdf]

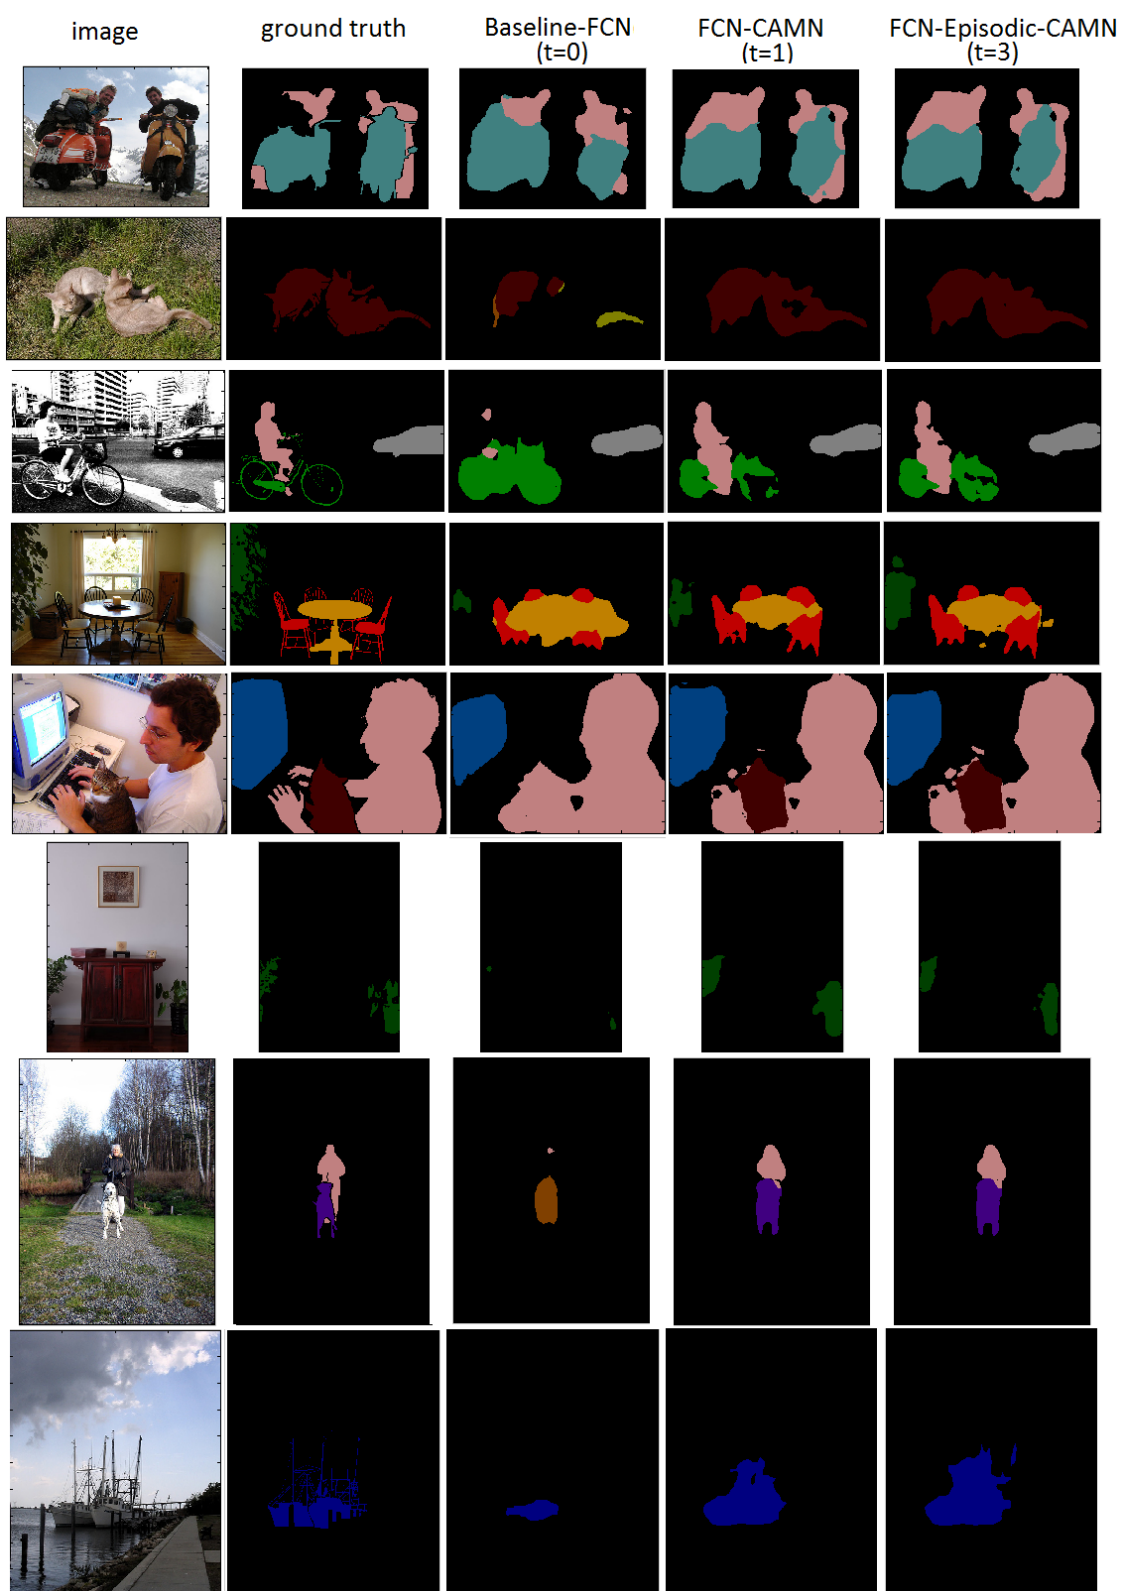

Figure 7. Supplemental Material. Examples of qualitative labeling results (best viewed in color). The images are from PASCAL VOC 2011 dataset.

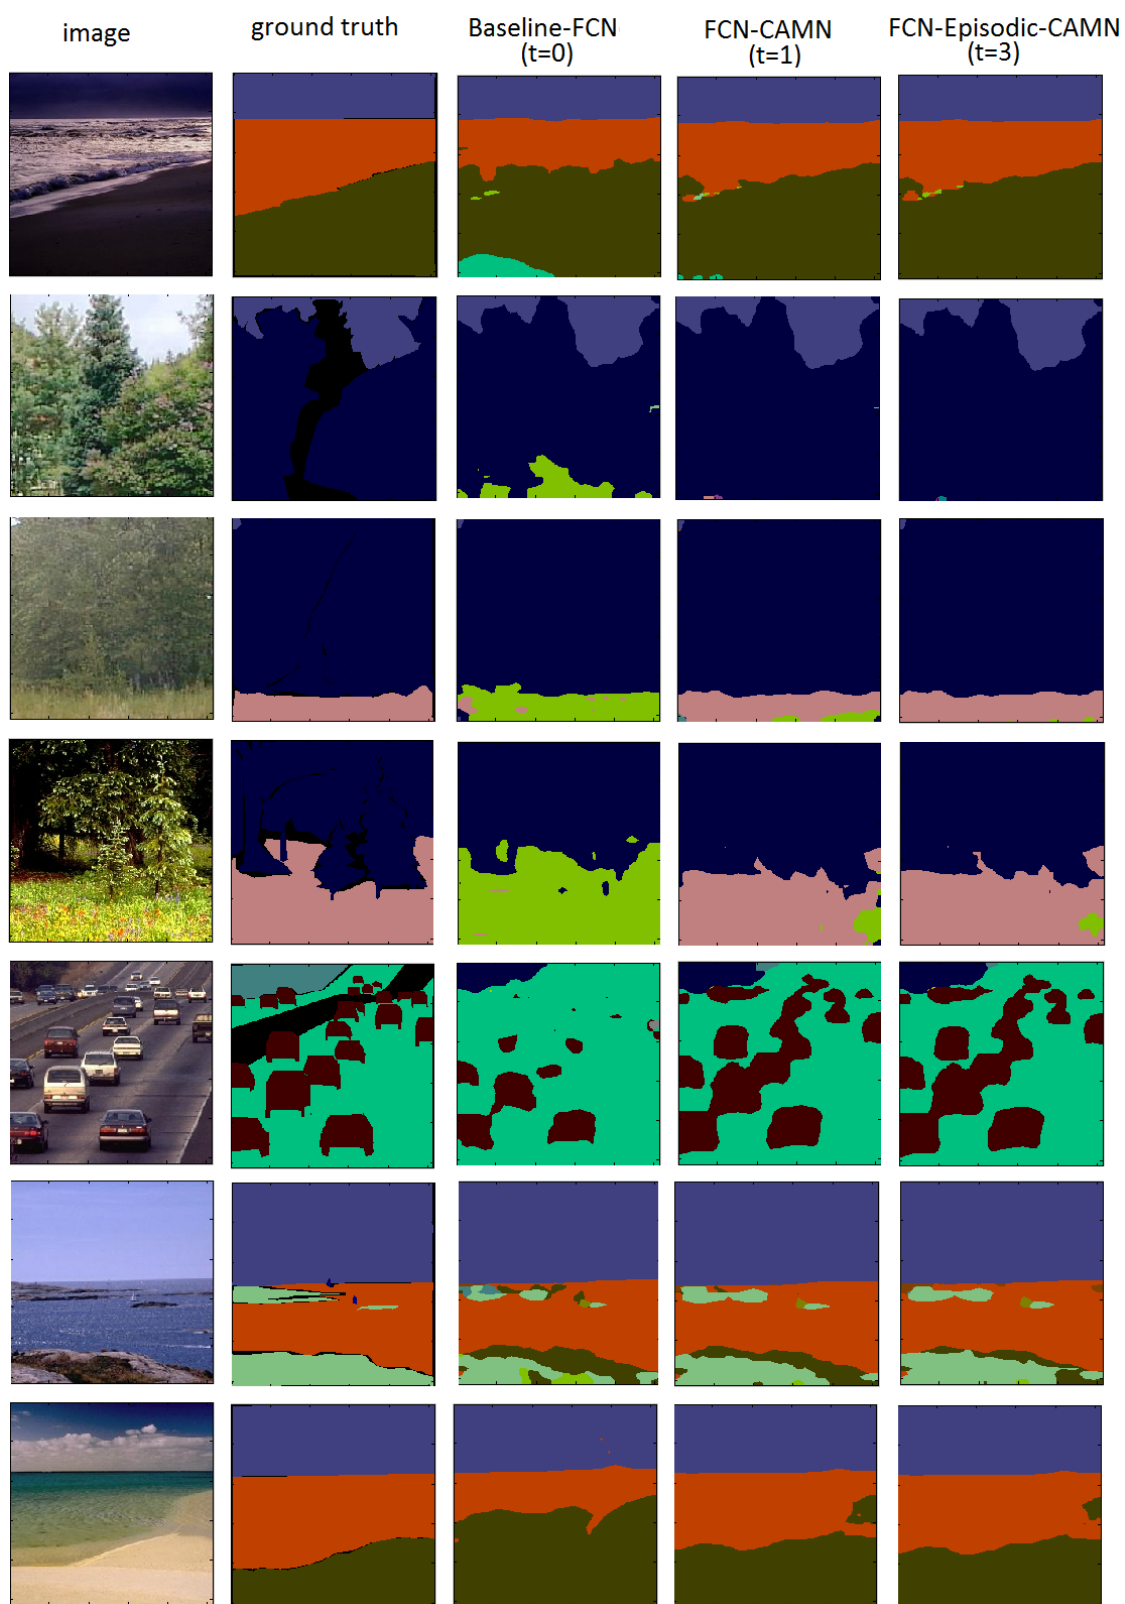

Figure 8. Supplemental Material. Examples of qualitative labeling results (best viewed in color). The images are from SIFT Flow dataset.
